# Supplementary material
Source: PubMed Central journal article supplement (PMC2768491)
Supplement: NIHMS144293-supplement-1_si_001.pdf [file NIHMS144293-supplement-1_si_001.pdf]

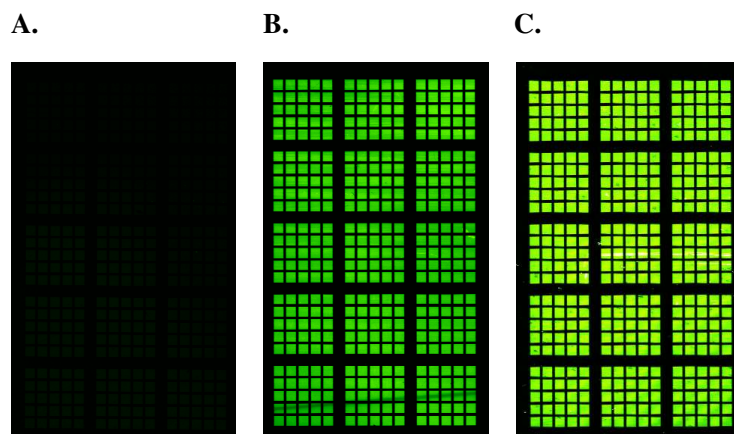

Figure S1. *in situ* DNA synthesis ( $5'$ -ACTCTTGCAGGTCATCGGC(T)<sub>15</sub>- $3'$ ) on amorphous carbon (aC) substrates followed by hybridization of a fluorescently labeled complement ( $5'$ -GCCGATGACCTGCAAGAGT-FAM- $3'$ ) to the DNA array. (A) unmodified aC; (B) 9-decene-1-ol functionalized aC; (C) (EG)<sub>4</sub> functionalized aC.

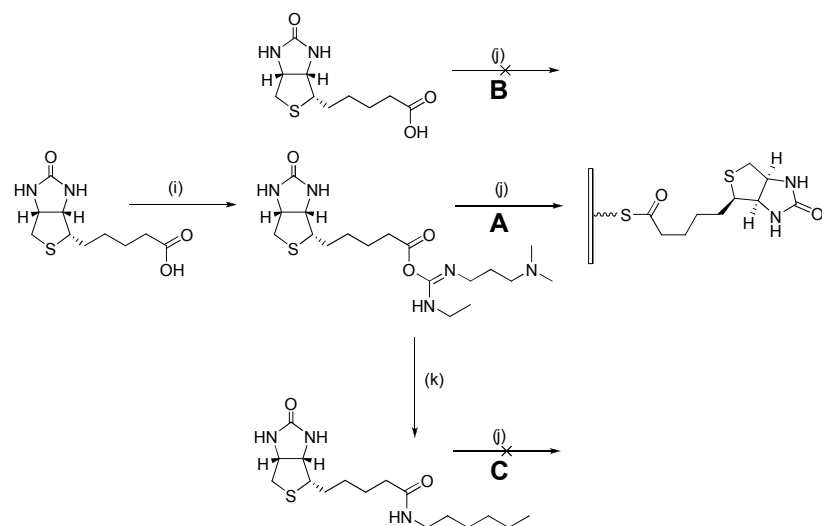

Scheme S1. Schematic illustration showing the derivatization of biotin followed by surface coupling. Reagents and conditions: (i) N-(3-dimethylaminopropyl)-N'-ethylcarbodiimide hydrochloride, 4, 4-di(methylamino)pyridine, N, N-Dimethylformamide, room temperature, 2 h; (j) biotin or biotin derivatives in DMF as exposure solvent; (k) hexylamine, room temperature, 2 h.

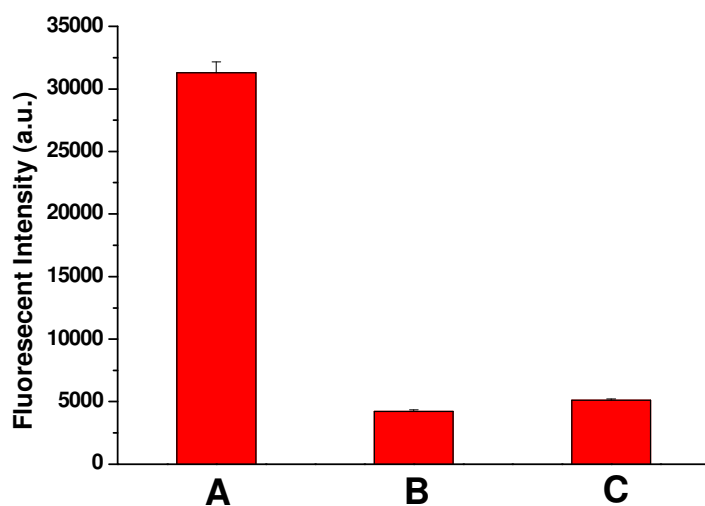

Figure S2. Fluorescence intensities after FITC-avidin staining of biotin functionalized surfaces. Letters on the bottom correspond to routes of biotin derivatization employed in Scheme S1. (A) EDC-activated biotin in DMF as exposure solvent; (B) free biotin in DMF as exposure solvent; (C) EDC-activated biotin followed by quenching by adding hexylamine in DMF as exposure solvent.
